# Supplementary material for: A novel mitochondrial pyruvate carrier inhibitor drives stem cell-like memory CAR T cell generation and enhances antitumor efficacy
Source: PubMed Central journal article supplement (PMC11570499; doi:10.1016/j.omton.2024.200897), 2024-10-18
Supplement: mmc1.pdf [file mmc1.pdf]

**Supplemental information**

**A novel mitochondrial pyruvate carrier  
inhibitor drives stem cell-like memory CAR T  
cell generation and enhances antitumor efficacy**

**Mathias Wenes, Anouk Lepez, Vladimir Arinkin, Kinsey Maundrell, Orsolya Barabas, Federico Simonetta, Valérie Dutoit, Pedro Romero, Jean-Claude Martinou, and Denis Migliorini**

## Supplemental Material

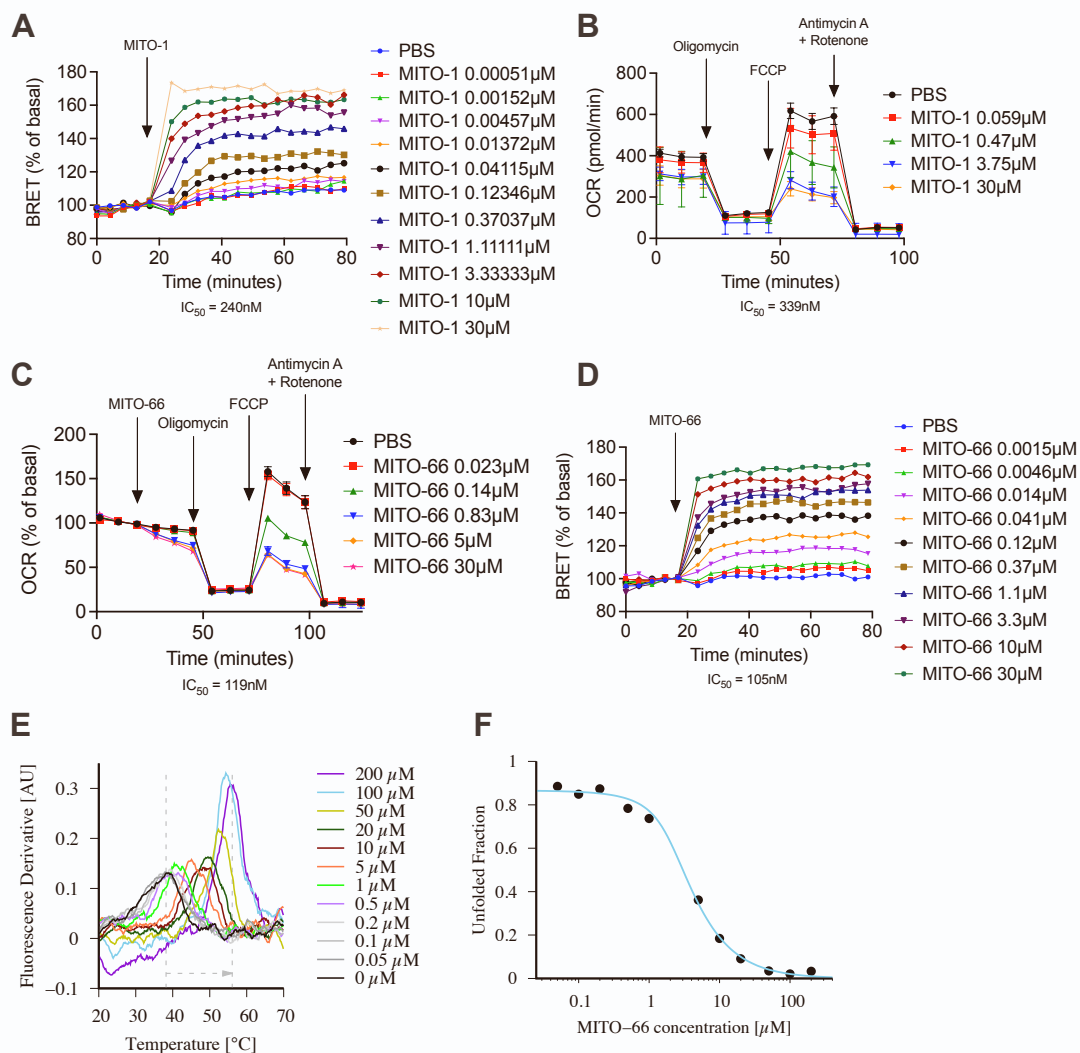

**Figure S1. MITO-66 is a novel small molecule inhibitor of the mitochondrial pyruvate carrier.**

(A) BRET assay in HEK293T cells with MITO-1 or PBS as control.

(B-C) Oxygen consumption rate (OCR) in HeLa cells measured by Seahorse using MPC inhibitor MITO-1 (B) or MITO-66 (C).  $IC_{50}$  was calculated based on drop in maximal oxygen consumption rate.

(D) BRET assay in HEK293T cells with MITO-66 or PBS as control.

(E) NanoDSF thermoshift analysis shows MPC1/MPC2 heterocomplex stability induced by MITO-66 binding. Fluorescence-based melting curves at different concentrations of MITO-66.

(F) Isothermal analysis for  $K_d$  estimation at 44.3°C (6.1°C above the protein  $T_m$ ).

Data is represented as mean  $\pm$  standard deviation (SD).

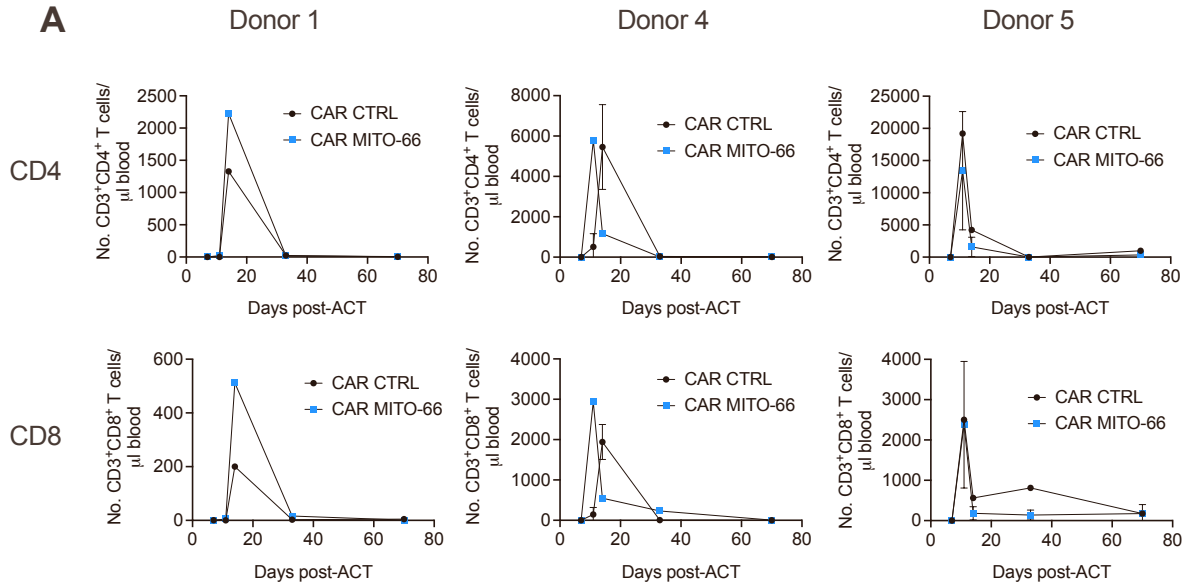

**Figure S2. MITO-66 conditioning during CAR T cell manufacturing enhances anti-tumor efficacy**

(A) Number of transferred CD4 or CD8 T cells in the blood of mice, derived from donors that induced survival following either DMSO- and MITO-66 conditioning.

Data is represented as mean  $\pm$  SD.

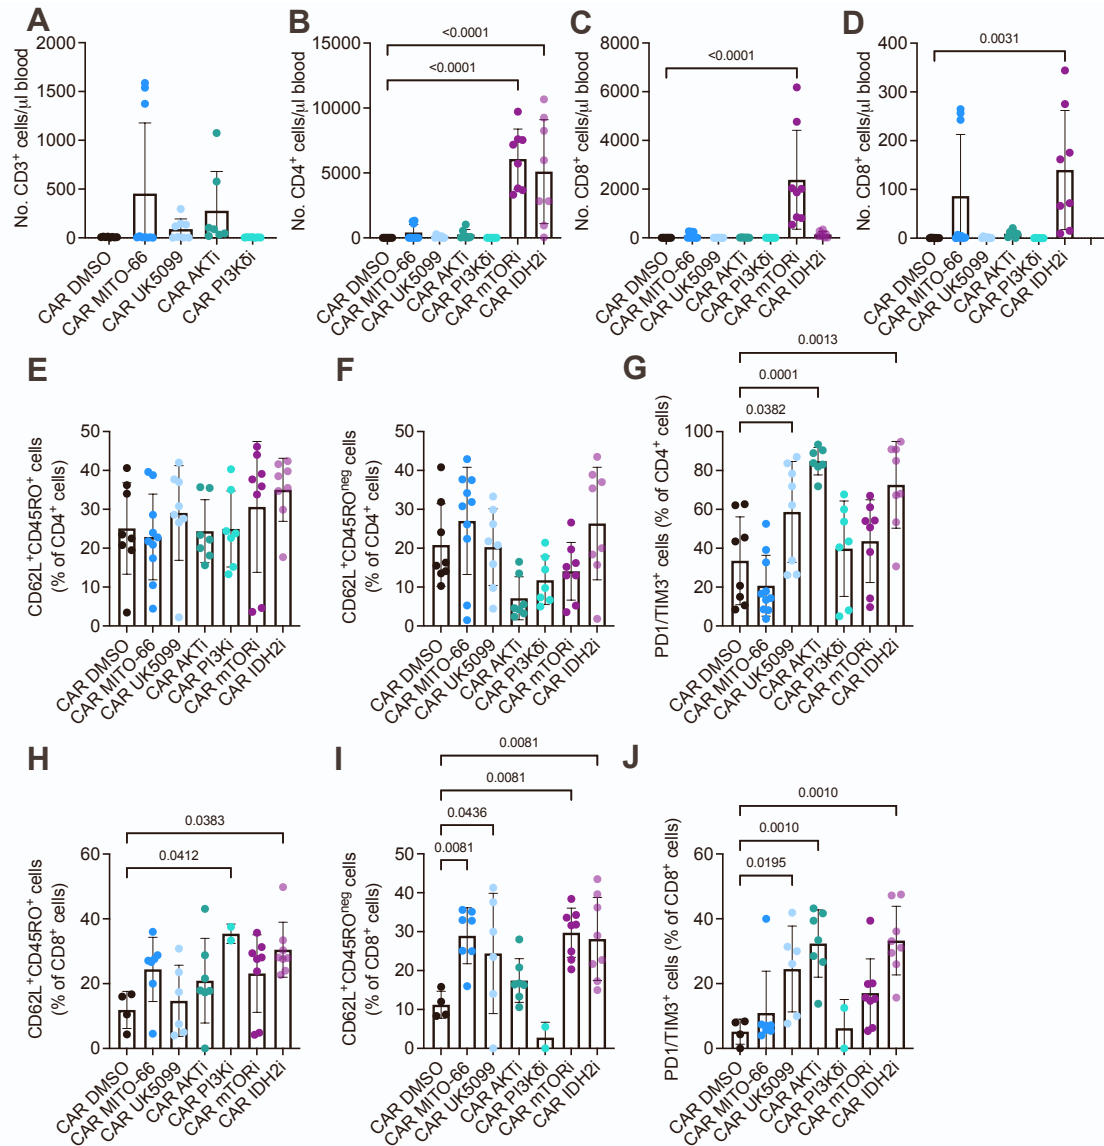

**Figure S3. Benchmarking MITO-66 against other small molecules influencing memory differentiation**

(A) Number of transferred CD3 T cells in the blood of mice analysed by flow cytometry at day 11 post-ACT. Similar data as main Figure 5H, graph without rapamycin- and IDH2i-CAR T cells for clarity.

(B-C) Number of transferred CD4 (B) or CD8 (C) T cells in the blood of mice analysed by flow cytometry at day 11 post-ACT.

(D) Number of transferred CD8 T cells in the blood of mice analysed by flow cytometry at day 11 post-ACT. Similar data as Supplemental Figure 3C, graph without rapamycin-CAR T cells for clarity.

(E-G) Percentage of CD62L/CD45RO double positive cells (E), CD62L-positive, CD45RO-negative cells (F) or PD1/TIM3 double positive cells (G) in transferred CD4 T cells at day 11 post-ACT.

(H-J) Percentage of CD62L/CD45RO double positive cells (H), CD62L-positive, CD45RO-negative cells (I) or PD1/TIM3 double positive cells (J) in transferred CD8 T cells at day 11 post-ACT. (A-J: 3 human donors into 9-10 total mice, pooled data from 2 independent experiments. Only flow cytometry data with >20 events were used for phenotypic analysis).

Data is represented as mean  $\pm$  SD. Statistics are based on one-way ANOVA.

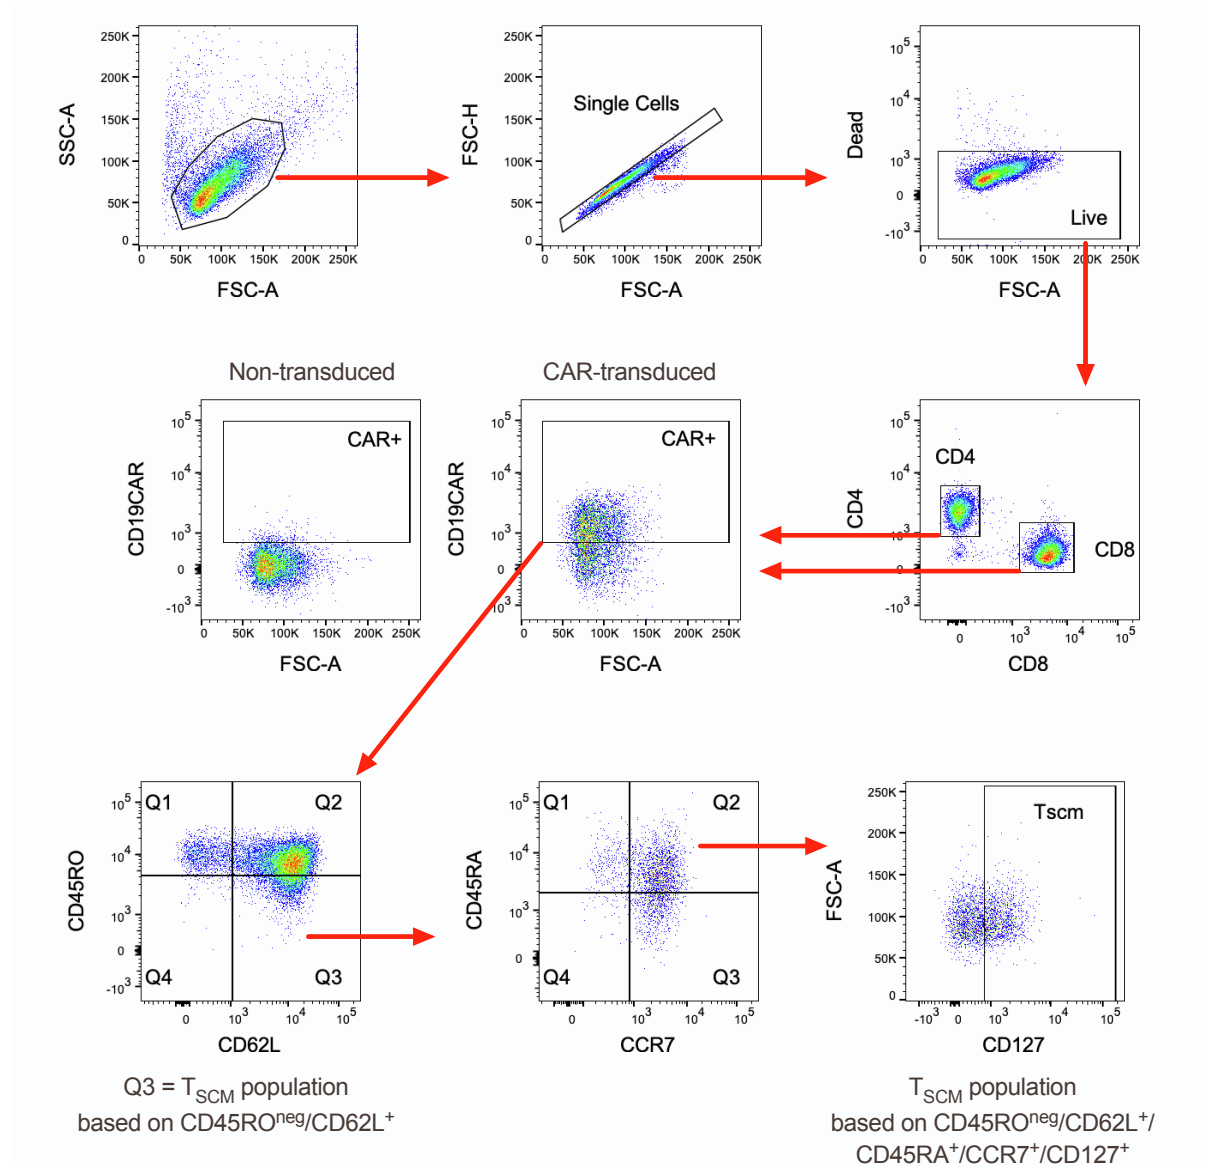

**Figure S4. Flow cytometry gating strategy**

Strategy used for selecting live, single cells for further downstream division in memory T cell subsets.

**Table S1: Clinical parameters of patient samples used for experiments in Figure 6.**

| <b>Patient</b> | <b>Sex</b> | <b>Age at Diagnosis</b> | <b>Diagnosis</b>                        | <b>Treatment received before sample collection</b> |
|----------------|------------|-------------------------|-----------------------------------------|----------------------------------------------------|
| 1              | M          | 64                      | DLBCL                                   | Methotrexate, CCNU, procarbazine, steroids         |
| 2              | F          | 75                      | DLBCL                                   | No                                                 |
| 3              | F          | 60                      | DLBCL                                   | No                                                 |
| 4              | M          | 76                      | DLBCL                                   | No                                                 |
| 5              | M          | 77                      | Follicular lymphoma                     | No                                                 |
| 6              | M          | 68                      | DLBCL                                   | No                                                 |
| 7              | M          | 71                      | DLBCL                                   | R-CHOP, R-ICE                                      |
| 8              | M          | 57                      | Richter's Syndrome                      | R-CHOP, R-DHAP, Ibrutinib, allogeneic HSCT         |
| 9              | F          | 69                      | DLBCL (Transformed follicular lymphoma) | R-Bendamustine, R-CHOP                             |
| 10             | F          | 71                      | DLBCL                                   | R-CHOP, MATRix                                     |
| 11             | M          | 58                      | DLBCL                                   | R-CHOP, R-ICE                                      |
